# Supplementary material for: Identification of Chinese baijiu from the same brand based on a graphene quantum dots fluorescence sensing array
Source: Royal Society of Chemistry journal article supplement (doi:10.1039/d3ay01083j), 2023-01-01
Supplement: d3ay01083j1.pdf [file d3ay01083j1.pdf]

1

## Support information

2

3

**Table S1** Main reagents

| Reagent                 | Specification     | Manufacturer                                      |
|-------------------------|-------------------|---------------------------------------------------|
| 1,2-diaminobenzene, OPD | Analytically pure | Shanghai Aladdin Biochemical Technology Co., Ltd. |
| Pyrocatechol            | Analytically pure | Shanghai Aladdin Biochemical Technology Co., Ltd. |
| Citric acid             | Analytically pure | Chongqing Chuandong Chemical Group Co., Ltd.      |
| DMF                     | Analytically pure | Chongqing Chuandong Chemical Group Co., Ltd.      |
| Ethylene glycol         | Analytically pure | Shanghai Aladdin Biochemical Technology Co., Ltd. |
| DMSO                    | Analytically pure | Shanghai Aladdin Biochemical Technology Co., Ltd. |
| Formic acid             | Analytically pure | Shanghai Aladdin Biochemical Technology Co., Ltd. |
| Acetic acid             | Analytically pure | Shanghai Aladdin Biochemical Technology Co., Ltd. |
| Acrylic acid            | Analytically pure | Shanghai Aladdin Biochemical Technology Co., Ltd. |
| Butyric acid            | Analytically pure | Shanghai Aladdin Biochemical Technology Co., Ltd. |
| Valeric acid            | Analytically pure | Shanghai Aladdin Biochemical Technology Co., Ltd. |
| Formaldehyde            | Analytically pure | Shanghai Titan Technology Co., Ltd.               |
| Acetaldehyde            | Analytically pure | Shanghai Titan Technology Co., Ltd.               |
| 1,1-Diethox             | Analytically pure | Shanghai Titan Technology Co., Ltd.               |
| Furfural                | Analytically pure | Shanghai Titan Technology Co., Ltd.               |
| Butyraldehyde           | Analytically pure | Shanghai Titan Technology Co., Ltd.               |
| Valeraldehyde           | Analytically pure | Shanghai Titan Technology Co., Ltd.               |
| Methyl alcohol          | Analytically pure | Chongqing Chuandong Chemical Group Co., Ltd.      |
| 1-Propanol              | Analytically pure | Chongqing Chuandong Chemical Group Co., Ltd.      |
| 1-Butanol               | Analytically pure | Chongqing Chuandong Chemical Group Co., Ltd.      |
| 1-Hexanol               | Analytically pure | Chongqing Chuandong Chemical Group Co., Ltd.      |
| Ethyl formate           | Analytically pure | Shanghai Aladdin Biochemical Technology Co., Ltd. |
| Ethyl acetate           | Analytically pure | Shanghai Aladdin Biochemical Technology Co., Ltd. |

| Reagent         | Specification     | Manufacturer                                      |
|-----------------|-------------------|---------------------------------------------------|
| Ethyl valerate  | Analytically pure | Shanghai Aladdin Biochemical Technology Co., Ltd. |
| Ethyl caproate  | Analytically pure | Shanghai Aladdin Biochemical Technology Co., Ltd. |
| Ethyl caprylate | Analytically pure | Shanghai Aladdin Biochemical Technology Co., Ltd. |
| Ethyl lactate   | Analytically pure | Shanghai Aladdin Biochemical Technology Co., Ltd. |

4

5

**Table S2** Information on 17 kinds of Wuliangye series Baijiu

| No. | Distilled liquor             | Alcohol content |
|-----|------------------------------|-----------------|
| 1   | Jianzhuang Gaoguang          | 50°             |
| 2   | Jianzhuang Daguang           | 50°             |
| 3   | Wuliangchun                  | 35°             |
| 4   | Wuliangchun                  | 45°             |
| 5   | Wuliangchun                  | 50°             |
| 6   | Dongfangjiaozi               | 52°             |
| 7   | Fuguitianxia                 | 52°             |
| 8   | Wuliangtouqu                 | 52°             |
| 9   | Mianroujianzhuang            | 50°             |
| 10  | Wuliangtequ                  | 52°             |
| 11  | Wuliangtequ Boutique         | 52°             |
| 12  | Wuliangtouqu                 | 52°             |
| 13  | Wuliangchun Red Packaging    | 50°             |
| 14  | Wuliangchun Golden Packaging | 50°             |
| 15  | Wuliangchun Silver Packaging | 50°             |
| 16  | Wuliangye                    | 52°             |
| 17  | Xinglong Shangpin            | 52°             |

6

7

**Table S3** Main instruments and equipment

| Instrument name Model | Specifications | Manufacturer |
|-----------------------|----------------|--------------|
|-----------------------|----------------|--------------|

| Instrument name Model                            | Specifications   | Manufacturer                                            |
|--------------------------------------------------|------------------|---------------------------------------------------------|
| Electronic Balance                               | EL-204           | METTLER TOLEDO Instruments Ltd.                         |
| Electric blast drying oven                       | DHG-9055A        | Shanghai Yiheng Scientific Instrument Co., Ltd.         |
| Fluorescence spectrophotometer                   | FL970            | Tianmei Yituo Laboratory Equipment (Shanghai) Co., Ltd. |
| Fourier Transform Infrared Spectrometer          | Nicolet iS50     | Thermo Fisher Scientific (China) Co., Ltd.              |
| X-ray photoelectron spectrometer                 | ESCALAB250Xi     | Thermo Fisher Scientific                                |
| Ultrapure water machine                          | Milli-Q Academic | Millipore Corporation of America                        |
| Ultrasonic cleaner                               | GVS-2L           | Shenzhen Goway Technology Co., Ltd.                     |
| Transient steady-state fluorescence spectrometer | FLS1000          | Edinburgh, UK                                           |
| Transmission electron microscope                 | JEM-1400PLUS     | JEOL Corporation of Japan                               |

8

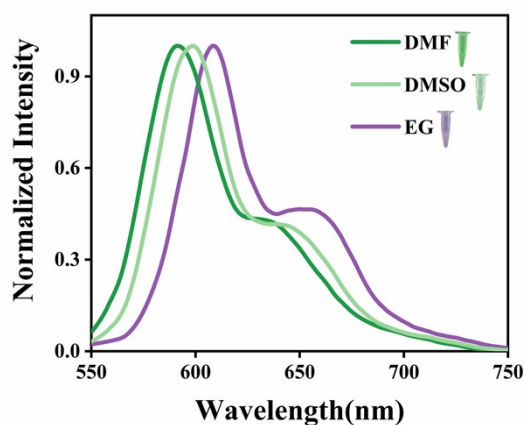

9

10 **Fig. S1.** Normalized fluorescence of GQDs in three solvents (DMF, DMSO and EG)

11

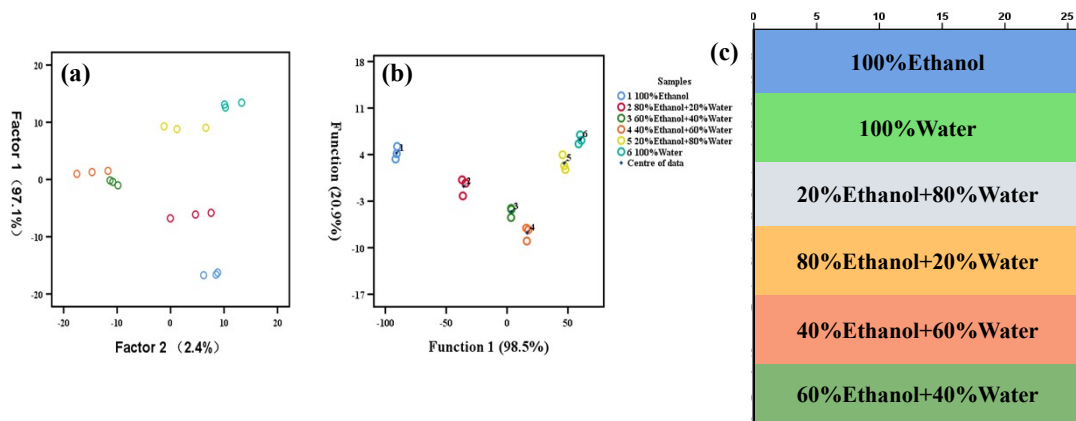

12

13 **Fig. S2.**Detection of ethanol-water mixed solutions of different concentrations (a)PCA; (b)LDA;

14

(c)HCA

15

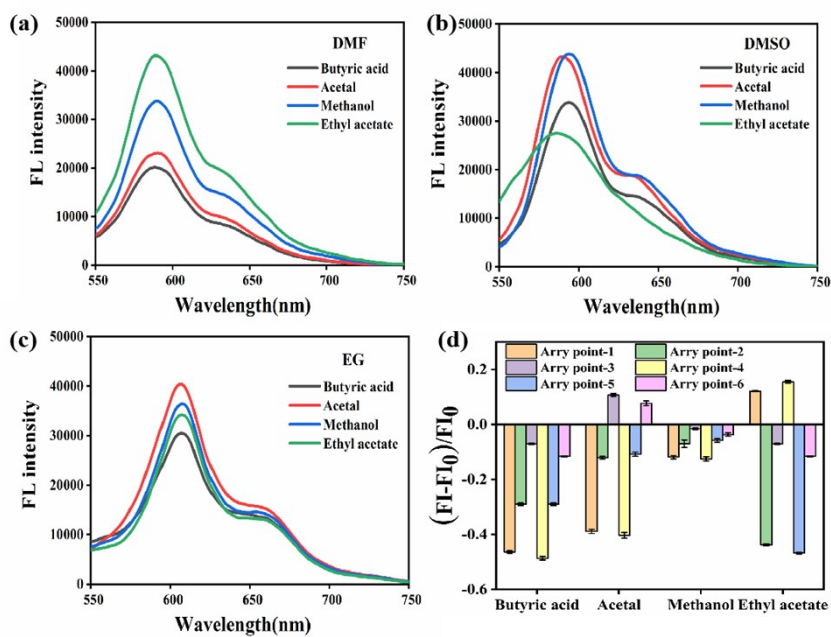

16

17

**Fig. S3.** Feasibility study of small organic molecule detection

18

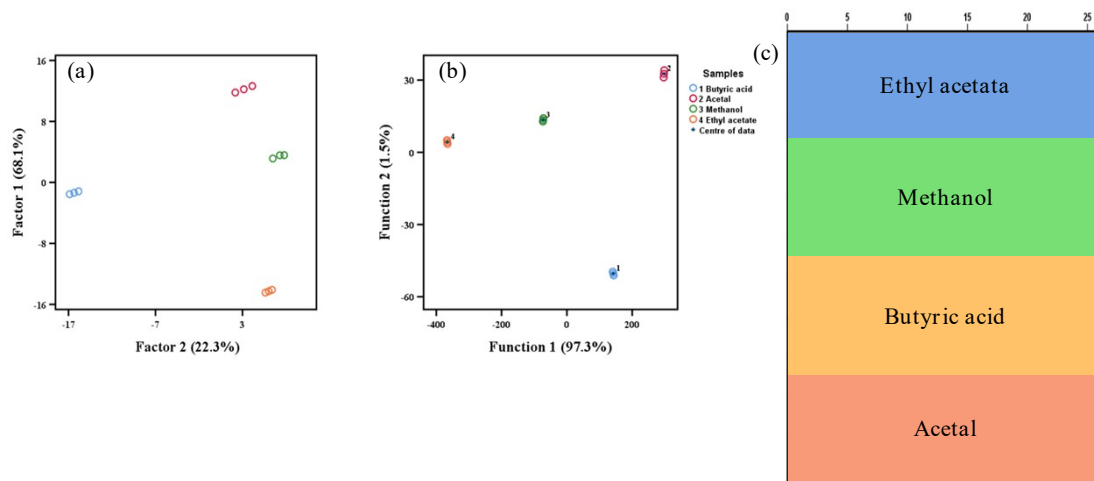

19

20

**Fig. S4.** Feasibility study of small organic molecule detection

21

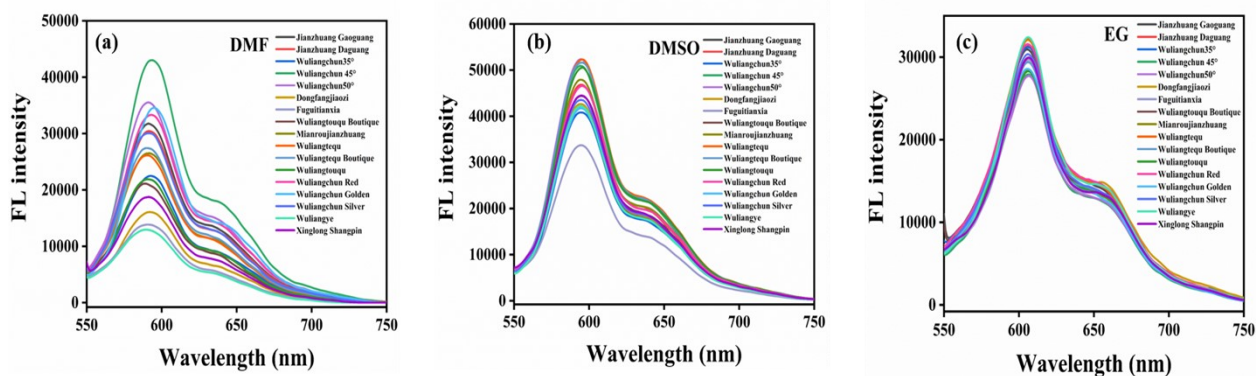

22

23

**Fig. S5.** Fluorescence spectra of the GQDs after reaction with Wuliangye Baijiu. (a) DMF;

24

(b) DMSO; (c) EG

25

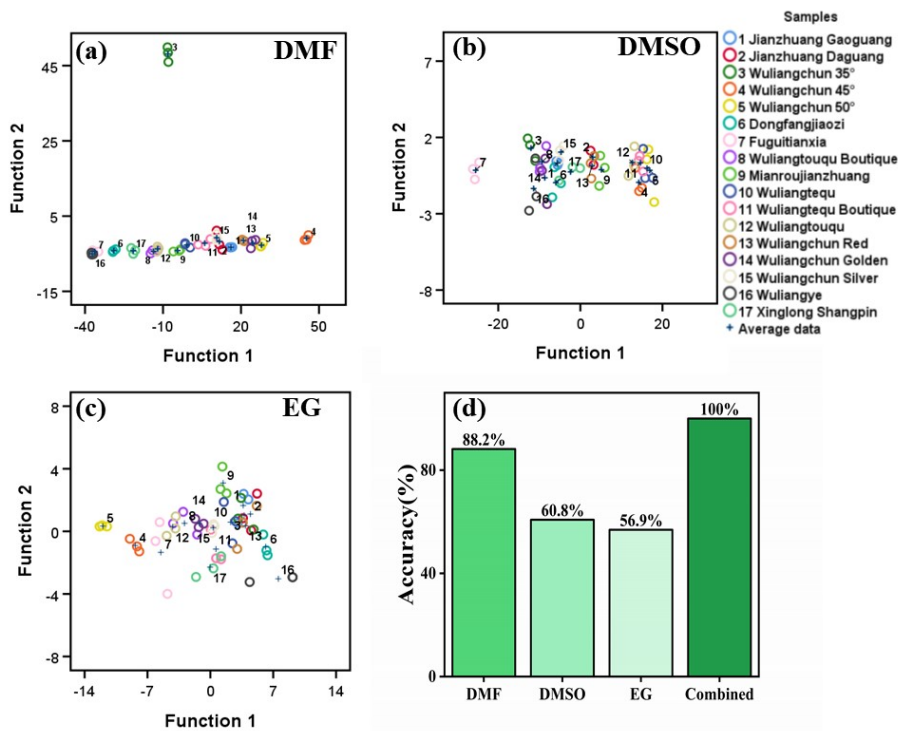

26

27 **Fig. S6.** LDA detection graphs with a single solvent array (a) DMF; (b) DMSO; (c) EG; (d)

28 detection capability compared to a composite array

29

30

31 **Fig. S7.** LDA analysis chart of 22 distilled spirits

32

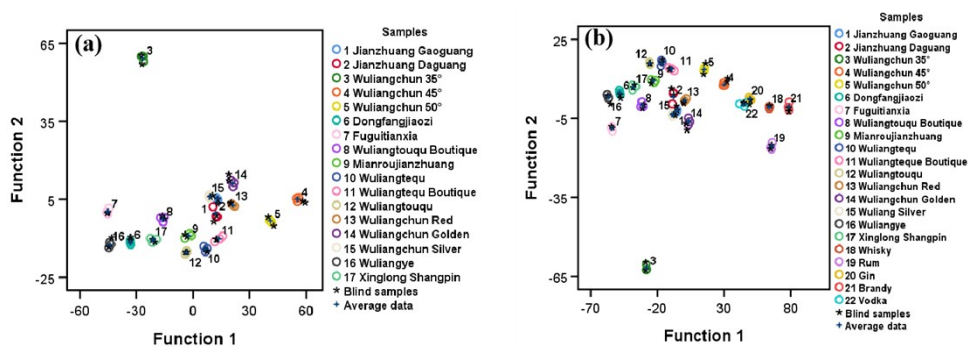

33

34 **Fig. S8.** Detection of blind samples (a) Wuliangye Baijiu; (b) 22 distilled spirits

35

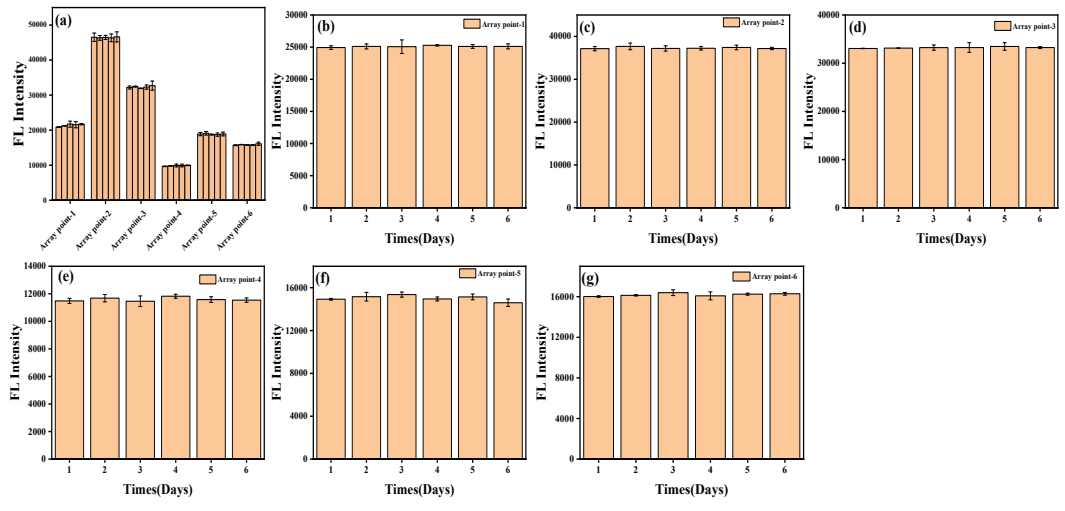

36

37 **Fig. S9.**(a)Repeatability detection; Stability (b)Array point-1; (c)Array point-2; (d)Array point-3;

38

(e)Array point-4; (f)Array point-5; (g)Array point-6.
